# Supplementary material for: Evaluation of a national complex oral health improvement programme: a population data linkage cohort study in Scotland
Source: PubMed Central journal article supplement — BMJ Open. 2020 Nov 24;10(11):e038116. doi: 10.1136/bmjopen-2020-038116 (PMC7689100; doi:10.1136/bmjopen-2020-038116), 2020-11-24
Supplement: bmjopen-2020-038116supp001.pdf [file bmjopen-2020-038116supp001.pdf]

**Supplementary Table 1: Distribution of Caries by Potential Confounders and Exposure to each Childsmile Intervention**

|                                            | Total number of children in cohort |              | Obvious Caries Experience |              |
|--------------------------------------------|------------------------------------|--------------|---------------------------|--------------|
|                                            | n                                  | % (n/15,032) | n                         | % (n/15,032) |
| <b>SIMD</b>                                |                                    |              |                           |              |
| 1 (most deprived)                          | 11,777                             | (23.4)       | 5,310                     | (35.3)       |
| 2                                          | 10,092                             | (20.0)       | 3,549                     | (23.6)       |
| 3                                          | 9,609                              | (19.1)       | 2,597                     | (17.3)       |
| 4                                          | 9,876                              | (19.6)       | 2,154                     | (14.3)       |
| 5 (least deprived)                         | 9,025                              | (17.9)       | 1,422                     | (9.5)        |
| <b>Age</b>                                 |                                    |              |                           |              |
| 4                                          | 2,974                              | (5.9)        | 788                       | (5.2)        |
| 5                                          | 43,165                             | (85.7)       | 12,847                    | (85.5)       |
| 6                                          | 4,240                              | (8.4)        | 1,397                     | (9.3)        |
| <b>Sex</b>                                 |                                    |              |                           |              |
| Female                                     | 24,736                             | (49.1)       | 7129                      | (47.4)       |
| Male                                       | 25,643                             | (50.9)       | 7903                      | (52.6)       |
| <b>DHSW Contacts</b>                       |                                    |              |                           |              |
| Not Targeted                               | 40,647                             | (80.7)       | 11,547                    | (76.8)       |
| 0                                          | 979                                | (1.9)        | 442                       | (2.9)        |
| 1                                          | 7,816                              | (15.5)       | 2,624                     | (17.5)       |
| 2 plus                                     | 937                                | (1.9)        | 419                       | (2.8)        |
| <b>Number of Nursery FVA</b>               |                                    |              |                           |              |
| Not Targeted                               | 18,798                             | (37.3)       | 4,306                     | (28.6)       |
| 0                                          | 6,968                              | (13.8)       | 2,233                     | (14.9)       |
| 1                                          | 4,770                              | (9.5)        | 1,676                     | (11.1)       |
| 2                                          | 4,682                              | (9.3)        | 1,676                     | (11.1)       |
| 3                                          | 5,323                              | (10.6)       | 1,844                     | (12.3)       |
| 4                                          | 5,483                              | (10.9)       | 1,843                     | (12.3)       |
| 5 plus                                     | 4,355                              | (8.6)        | 1,454                     | (9.7)        |
| <b>Primary Care Dental Services Visits</b> |                                    |              |                           |              |
| 0                                          | 14,842                             | (29.5)       | 4,708                     | (31.3)       |
| 1                                          | 10,653                             | (21.1)       | 3,699                     | (24.6)       |
| 2                                          | 8,265                              | (16.4)       | 2,620                     | (17.4)       |
| 3                                          | 6,179                              | (12.3)       | 1,676                     | (11.1)       |
| 4                                          | 4,529                              | (9.0)        | 1,080                     | (7.2)        |
| 5                                          | 3,063                              | (6.1)        | 669                       | (4.5)        |
| 6 plus                                     | 2,848                              | (5.7)        | 580                       | (3.9)        |
| <b>Nursery Supervised Toothbrushing</b>    |                                    |              |                           |              |
| 0 (no consent)                             | 5,511                              | (10.9)       | 1,572                     | (10.5)       |
| Up to 1 year                               | 3,565                              | (7.1)        | 1,269                     | (8.4)        |
| >1 to 2 years                              | 12,579                             | (25.0)       | 3,990                     | (26.5)       |
| >2 to 3 years                              | 23,136                             | (45.9)       | 6,931                     | (46.1)       |
| >3 years                                   | 5,588                              | (11.1)       | 1,270                     | (8.4)        |

SIMD - Scottish Index of Multiple Deprivation Index  
 FVA - Fluoride Varnish Applications
