# Supplementary material for: Evaluation of a national complex oral health improvement programme: a population data linkage cohort study in Scotland
Source: PubMed Central journal article supplement — BMJ Open. 2020 Nov 24;10(11):e038116. doi: 10.1136/bmjopen-2020-038116 (PMC7689100; doi:10.1136/bmjopen-2020-038116), 2020-11-24
Supplement: bmjopen-2020-038116supp002.pdf [file bmjopen-2020-038116supp002.pdf]

**Supplementary Table 2: Association Between SIMD and the Reach of Each Childsmile Intervention**

| Childsmile Component                              | OR   | 95% CI       | p-value | c-index |
|---------------------------------------------------|------|--------------|---------|---------|
| Dental Health Support Worker Intervention         | 0.67 | (0.65, 0.68) | <0.001  | 0.65    |
| Nursery Fluoride Varnish Application Intervention | 0.58 | (0.57, 0.58) | <0.001  | 0.71    |
| Primary Care Dental Practice Intervention         | 1.01 | (1.00, 1.03) | 0.048   | 0.52    |
| Nursery Supervised Toothbrushing Intervention     | 0.75 | (0.73, 0.77) | <0.001  | 0.59    |

**SIMD - Scottish Index of Multiple Deprivation Index**
