# Supplementary material for: Evaluation of a national complex oral health improvement programme: a population data linkage cohort study in Scotland
Source: PubMed Central journal article supplement — BMJ Open. 2020 Nov 24;10(11):e038116. doi: 10.1136/bmjopen-2020-038116 (PMC7689100; doi:10.1136/bmjopen-2020-038116), 2020-11-24
Supplement: bmjopen-2020-038116supp003.pdf [file bmjopen-2020-038116supp003.pdf]

**Supplementary Table 3: Unadjusted and Adjusted Odds Ratios and 95% CIs for Caries Experience According to Nursery Supervised Toothbrushing by SIMD**

| Nursery Supervised<br>Toothbrushing | Total | Caries Experience |        | No Caries Experience |        | Unadjusted |              |         | Model-1 |              |         | Model-2 |              |         |
|-------------------------------------|-------|-------------------|--------|----------------------|--------|------------|--------------|---------|---------|--------------|---------|---------|--------------|---------|
|                                     |       | n                 | %      | n                    | %      | OR         | 95% CI       | p-value | OR      | 95% CI       | p-value | OR      | 95% CI       | p-value |
| <b>SIMD 1 (Most Deprived)</b>       |       |                   |        |                      |        |            |              |         |         |              |         |         |              |         |
| 0 (no consent)                      | 674   | 353               | (52.4) | 321                  | (47.6) | -          | Referent     | -       | -       | Referent     | -       | -       | Referent     | -       |
| Up to 1 year                        | 1,279 | 585               | (45.7) | 694                  | (54.3) | 0.77       | (0.64, 0.92) | 0.005   | 0.77    | (0.64, 0.93) | 0.007   | 0.67    | (0.55, 0.82) | 0.001   |
| >1 to 2 years                       | 3,473 | 1,565             | (45.1) | 1,908                | (54.9) | 0.75       | (0.63, 0.88) | <0.001  | 0.76    | (0.65, 0.90) | 0.001   | 0.67    | (0.56, 0.80) | <0.001  |
| >2 to 3 years                       | 5,410 | 2,449             | (45.3) | 2,961                | (54.7) | 0.75       | (0.64, 0.88) | <0.001  | 0.73    | (0.62, 0.86) | <0.001  | 0.66    | (0.55, 0.79) | <0.001  |
| >3 years                            | 941   | 358               | (38.0) | 583                  | (62.0) | 0.56       | (0.46, 0.68) | <0.001  | 0.54    | (0.44, 0.66) | <0.001  | 0.49    | (0.39, 0.60) | <0.001  |
| <b>SIMD 2</b>                       |       |                   |        |                      |        |            |              |         |         |              |         |         |              |         |
| 0 (no consent)                      | 779   | 338               | (43.4) | 441                  | (56.6) | -          | Referent     | -       | -       | Referent     | -       | -       | Referent     | -       |
| Up to 1 year                        | 750   | 301               | (40.1) | 449                  | (59.9) | 0.87       | (0.71, 1.07) | 0.197   | 0.89    | (0.72, 1.09) | 0.259   | 0.82    | (0.66, 1.02) | 0.078   |
| >1 to 2 years                       | 2,619 | 934               | (35.7) | 1,685                | (64.3) | 0.72       | (0.61, 0.85) | <0.001  | 0.74    | (0.63, 0.88) | <0.001  | 0.71    | (0.59, 0.84) | <0.001  |
| >2 to 3 years                       | 4,863 | 1,667             | (34.3) | 3,196                | (65.7) | 0.68       | (0.58, 0.46) | <0.001  | 0.67    | (0.58, 0.79) | <0.001  | 0.68    | (0.57, 0.80) | <0.001  |
| >3 years                            | 1,081 | 309               | (28.6) | 772                  | (71.4) | 0.52       | (0.43, 0.63) | <0.001  | 0.51    | (0.42, 0.62) | <0.001  | 0.51    | (0.42, 0.63) | <0.001  |
| <b>SIMD 3</b>                       |       |                   |        |                      |        |            |              |         |         |              |         |         |              |         |
| 0 (no consent)                      | 1,112 | 333               | (29.9) | 779                  | (70.1) | -          | Referent     | -       | -       | Referent     | -       | -       | Referent     | -       |
| Up to 1 year                        | 536   | 180               | (33.6) | 356                  | (66.4) | 1.18       | (0.95, 1.47) | 0.135   | 1.24    | (0.99, 1.55) | 0.057   | 1.14    | (0.90, 1.44) | 0.277   |
| >1 to 2 years                       | 2,198 | 612               | (27.8) | 1,586                | (72.2) | 0.90       | (0.77, 1.06) | 0.206   | 0.97    | (0.82, 1.13) | 0.667   | 0.91    | (0.77, 1.08) | 0.265   |
| >2 to 3 years                       | 4,680 | 1,240             | (26.5) | 3,440                | (73.5) | 0.84       | (0.73, 0.97) | 0.020   | 0.84    | (0.73, 0.98) | 0.022   | 0.83    | (0.71, 0.97) | 0.019   |
| >3 years                            | 1,083 | 232               | (21.4) | 851                  | (78.6) | 0.64       | (0.53, 0.77) | <0.001  | 0.62    | (0.51, 0.76) | <0.001  | 0.62    | (0.51, 0.76) | <0.001  |
| <b>SIMD 4</b>                       |       |                   |        |                      |        |            |              |         |         |              |         |         |              |         |
| 0 (no consent)                      | 1,387 | 306               | (22.1) | 1,081                | (77.9) | -          | Referent     | -       | -       | Referent     | -       | -       | Referent     | -       |
| Up to 1 year                        | 478   | 106               | (22.2) | 372                  | (77.8) | 1.01       | (0.78, 1.29) | 0.959   | 1.03    | (0.80, 1.32) | 0.818   | 0.89    | (0.69, 1.16) | 0.381   |
| >1 to 2 years                       | 2,237 | 538               | (24.1) | 1,699                | (75.9) | 1.12       | (0.95, 1.31) | 0.169   | 1.16    | (0.99, 1.36) | 0.072   | 1.01    | (0.86, 1.20) | 0.876   |
| >2 to 3 years                       | 4,519 | 985               | (21.8) | 3,534                | (78.2) | 0.98       | (0.85, 1.14) | 0.834   | 0.98    | (0.85, 1.14) | 0.834   | 0.86    | (0.73, 1.00) | 0.050   |
| >3 years                            | 1,255 | 219               | (17.5) | 1,036                | (82.5) | 0.75       | (0.62, 0.91) | 0.003   | 0.74    | (0.61, 0.89) | 0.002   | 0.65    | (0.53, 0.79) | <0.001  |
| <b>SIMD 5 (Least Deprived)</b>      |       |                   |        |                      |        |            |              |         |         |              |         |         |              |         |
| 0 (no consent)                      | 1,559 | 242               | (15.5) | 1,317                | (84.5) | -          | Referent     | -       | -       | Referent     | -       | -       | Referent     | -       |
| Up to 1 year                        | 522   | 97                | (18.6) | 425                  | (81.4) | 1.24       | (0.96, 1.61) | 0.102   | 1.26    | (0.97, 1.63) | 0.082   | 1.15    | (0.88, 1.51) | 0.290   |
| >1 to 2 years                       | 2,052 | 341               | (16.6) | 1,711                | (83.4) | 1.08       | (0.91, 1.30) | 0.376   | 1.11    | (0.92, 1.32) | 0.274   | 0.99    | (0.82, 1.20) | 0.892   |
| >2 to 3 years                       | 3,664 | 590               | (16.1) | 3,074                | (83.9) | 1.04       | (0.89, 1.23) | 0.600   | 1.05    | (0.89, 1.23) | 0.569   | 0.93    | (0.78, 1.10) | 0.425   |
| >3 years                            | 1,228 | 152               | (12.4) | 1,076                | (87.6) | 0.77       | (0.62, 0.96) | 0.018   | 0.76    | (0.61, 0.95) | 0.014   | 0.70    | (0.56, 0.88) | 0.002   |

Model-1 adjusted for: Sex, and age

Model-2 adjusted for: Sex, age, the three other Childsmile Interventions (Dental Health Support Worker Contacts, Childsmile Dental Practice Contacts, and Nursery and School Fluoride Varnish Applications).

SIMD – Scottish Index of Multiple Deprivation
