# Supplementary material for: Evaluation of a national complex oral health improvement programme: a population data linkage cohort study in Scotland
Source: PubMed Central journal article supplement — BMJ Open. 2020 Nov 24;10(11):e038116. doi: 10.1136/bmjopen-2020-038116 (PMC7689100; doi:10.1136/bmjopen-2020-038116), 2020-11-24
Supplement: bmjopen-2020-038116supp004.pdf [file bmjopen-2020-038116supp004.pdf]

**Supplementary Table 4: Unadjusted and Adjusted Odds Ratios and 95% CIs for Caries Experience According to Nursery Fluoride Varnish Applications by SIMD (Page 1/2)**

| Number of Nursery FVA         | Total | Caries Experience |        | No Caries Experience |        | Unadjusted |              |         | Model-1 |              |         | Model-2 |              |         |
|-------------------------------|-------|-------------------|--------|----------------------|--------|------------|--------------|---------|---------|--------------|---------|---------|--------------|---------|
|                               |       | n                 | %      | n                    | %      | OR         | 95% CI       | P-value | OR      | 95% CI       | p-value | OR      | 95% CI       | P-value |
| <b>SIMD 1 (Most Deprived)</b> |       |                   |        |                      |        |            |              |         |         |              |         |         |              |         |
| <b>Not Targeted</b>           | 1,242 | 503               | (40.5) | 739                  | (59.5) | 0.80       | (0.69, 0.93) | 0.003   | 0.79    | (0.68, 0.92) | 0.002   | 0.79    | (0.68, 0.92) | 0.002   |
| <b>0</b>                      | 1,676 | 771               | (46.0) | 905                  | (54.0) | -          | Referent     | -       | -       | Referent     | -       | -       | Referent     | -       |
| <b>1</b>                      | 1,784 | 821               | (46.0) | 963                  | (54.0) | 1.00       | (0.88, 1.14) | 0.992   | 1.00    | (0.87, 1.14) | 0.979   | 1.08    | (0.94, 1.25) | 0.269   |
| <b>2</b>                      | 1,694 | 780               | (46.0) | 914                  | (54.0) | 1.00       | (0.87, 1.15) | 0.980   | 1.00    | (0.87, 1.15) | 0.998   | 1.09    | (0.94, 1.25) | 0.254   |
| <b>3</b>                      | 1,919 | 865               | (45.1) | 1,054                | (54.9) | 0.96       | (0.84, 1.10) | 0.578   | 0.96    | (0.84, 1.10) | 0.542   | 1.07    | (0.93, 1.23) | 0.373   |
| <b>4</b>                      | 1,950 | 881               | (45.2) | 1,069                | (54.8) | 0.97       | (0.85, 1.10) | 0.620   | 0.95    | (0.83, 1.08) | 0.429   | 1.08    | (0.94, 1.25) | 0.270   |
| <b>5 plus</b>                 | 1,512 | 689               | (45.6) | 823                  | (54.4) | 0.98       | (0.85, 1.13) | 0.806   | 0.94    | (0.82, 1.08) | 0.396   | 1.09    | (0.94, 1.28) | 0.252   |
| <b>SIMD 2</b>                 |       |                   |        |                      |        |            |              |         |         |              |         |         |              |         |
| <b>Not Targeted</b>           | 2,806 | 939               | (33.5) | 1,867                | (66.5) | 0.75       | (0.66, 0.86) | <0.001  | 0.75    | (0.66, 0.86) | <0.001  | 0.77    | (0.67, 0.87) | <0.001  |
| <b>0</b>                      | 1,427 | 571               | (40.0) | 856                  | (60.0) | -          | Referent     | -       | -       | Referent     | -       | -       | Referent     | -       |
| <b>1</b>                      | 1,062 | 386               | (36.3) | 676                  | (63.7) | 0.86       | (0.73, 1.01) | 0.063   | 0.86    | (0.73, 1.01) | 0.065   | 0.87    | (0.73, 1.02) | 0.105   |
| <b>2</b>                      | 946   | 343               | (36.3) | 603                  | (63.7) | 0.85       | (0.72, 1.01) | 0.066   | 0.85    | (0.72, 1.01) | 0.060   | 0.91    | (0.77, 1.09) | 0.274   |
| <b>3</b>                      | 1,292 | 473               | (36.6) | 819                  | (63.4) | 0.87       | (0.74, 1.01) | 0.068   | 0.87    | (0.74, 1.01) | 0.075   | 0.96    | (0.82, 1.12) | 0.529   |
| <b>4</b>                      | 1,395 | 472               | (33.8) | 923                  | (66.2) | 0.77       | (0.66, 0.89) | <0.001  | 0.76    | (0.65, 0.89) | <0.001  | 0.87    | (0.74, 1.02) | 0.058   |
| <b>5 plus</b>                 | 1,164 | 365               | (31.4) | 799                  | (68.6) | 0.68       | (0.58, 0.81) | <0.001  | 0.66    | (0.56, 0.78) | <0.001  | 0.80    | (0.67, 0.95) | 0.006   |
| <b>SIMD 3</b>                 |       |                   |        |                      |        |            |              |         |         |              |         |         |              |         |
| <b>Not Targeted</b>           | 4,082 | 1,065             | (26.1) | 3,017                | (73.9) | 0.88       | (0.77, 1.01) | 0.069   | 0.88    | (0.76, 1.01) | 0.065   | 0.90    | (0.78, 1.04) | 0.1550  |
| <b>0</b>                      | 1,302 | 373               | (28.6) | 929                  | (71.4) | -          | Referent     | -       | -       | Referent     | -       | -       | Referent     | -       |
| <b>1</b>                      | 753   | 213               | (28.3) | 540                  | (71.7) | 0.98       | (0.81, 1.20) | 0.861   | 0.99    | (0.81, 1.21) | 0.956   | 0.95    | (0.78, 1.17) | 0.626   |
| <b>2</b>                      | 753   | 242               | (32.1) | 511                  | (67.9) | 1.18       | (0.97, 1.43) | 0.096   | 1.19    | (0.98, 1.45) | 0.080   | 1.23    | (1.01, 1.50) | 0.038   |
| <b>3</b>                      | 940   | 255               | (27.1) | 685                  | (72.9) | 0.93       | (0.77, 1.12) | 0.429   | 0.94    | (0.78, 1.13) | 0.497   | 1.01    | (0.83, 1.22) | 0.953   |
| <b>4</b>                      | 968   | 245               | (25.3) | 723                  | (74.7) | 0.84       | (0.70, 1.02) | 0.077   | 0.84    | (0.69, 1.01) | 0.062   | 0.93    | (0.77, 1.13) | 0.481   |
| <b>5 plus</b>                 | 811   | 204               | (25.2) | 607                  | (74.8) | 0.84       | (0.69, 1.02) | 0.080   | 0.80    | (0.65, 0.98) | 0.029   | 0.92    | (0.75, 1.13) | 0.427   |

**Supplementary Table 4: Unadjusted and Adjusted Odds Ratios and 95% CIs for Caries Experience According to Nursery Fluoride Varnish Applications by SIMD (Page 2/2)**

| <b>SIMD 4</b>                  |       |     |        |       |        |      |              |       |      |              |        |      |              |       |  |
|--------------------------------|-------|-----|--------|-------|--------|------|--------------|-------|------|--------------|--------|------|--------------|-------|--|
| <b>Not Targeted</b>            | 5,020 | 979 | (19.5) | 4,041 | (80.5) | 0.78 | (0.68, 0.91) | 0.001 | 0.78 | (0.67, 0.90) | <0.001 | 0.78 | (0.67, 0.90) | 0.001 |  |
| <b>0</b>                       | 1,278 | 302 | (23.6) | 976   | (76.4) | -    | Referent     | -     | -    | Referent     | -      | -    | Referent     | -     |  |
| <b>1</b>                       | 691   | 168 | (24.3) | 523   | (75.7) | 1.04 | (0.84, 1.29) | 0.735 | 1.04 | (0.84, 1.29) | 0.737  | 1.03 | (0.83, 1.29) | 0.766 |  |
| <b>2</b>                       | 817   | 207 | (25.3) | 610   | (74.7) | 1.10 | (0.89, 1.34) | 0.374 | 1.09 | (0.89, 1.34) | 0.397  | 1.11 | (0.99, 1.36) | 0.330 |  |
| <b>3</b>                       | 776   | 189 | (24.4) | 587   | (75.6) | 1.04 | (0.84, 1.28) | 0.709 | 1.04 | (0.84, 1.28) | 0.722  | 1.04 | (0.85, 1.29) | 0.690 |  |
| <b>4</b>                       | 755   | 176 | (23.3) | 579   | (76.7) | 0.98 | (0.79, 1.21) | 0.870 | 0.98 | (0.79, 1.21) | 0.838  | 1.06 | (0.85, 1.31) | 0.623 |  |
| <b>5 plus</b>                  | 539   | 133 | (24.7) | 406   | (75.3) | 1.06 | (0.84, 1.34) | 0.634 | 1.04 | (0.82, 1.32) | 0.740  | 1.15 | (0.91, 1.47) | 0.246 |  |
| <b>SIMD 5 (Least Deprived)</b> |       |     |        |       |        |      |              |       |      |              |        |      |              |       |  |
| <b>Not Targeted</b>            | 5,648 | 820 | (14.5) | 4,828 | (85.5) | 0.84 | (0.71, 0.99) | 0.038 | 0.84 | (0.71, 0.99) | 0.036  | 0.82 | (0.70, 0.98) | 0.032 |  |
| <b>0</b>                       | 1,285 | 216 | (16.8) | 1,069 | (83.2) | -    | Referent     | -     | -    | Referent     | -      | -    | Referent     | -     |  |
| <b>1</b>                       | 480   | 88  | (18.3) | 392   | (81.7) | 1.11 | (0.85, 1.46) | 0.451 | 1.11 | (0.85, 1.46) | 0.445  | 1.05 | (0.80, 1.38) | 0.714 |  |
| <b>2</b>                       | 472   | 104 | (22.0) | 368   | (78.0) | 1.40 | (1.08, 1.82) | 0.012 | 1.41 | (1.08, 1.83) | 0.011  | 1.38 | (1.06, 1.80) | 0.017 |  |
| <b>3</b>                       | 396   | 62  | (15.7) | 334   | (84.3) | 0.92 | (0.68, 1.25) | 0.589 | 0.93 | (0.68, 1.26) | 0.620  | 0.96 | (0.70, 1.30) | 0.739 |  |
| <b>4</b>                       | 415   | 69  | (16.6) | 346   | (83.4) | 0.99 | (0.73, 1.33) | 0.931 | 0.99 | (0.74, 1.33) | 0.950  | 1.07 | (0.80, 1.44) | 0.708 |  |
| <b>5 plus</b>                  | 329   | 63  | (19.1) | 266   | (80.9) | 1.17 | (0.86, 1.60) | 0.317 | 1.16 | (0.85, 1.58) | 0.356  | 1.25 | (0.91, 1.73) | 0.212 |  |

Model-1 adjusted for: Sex, and age

Model-2 adjusted for: Sex, age, the three other Childsmile Interventions (Dental Health Support Worker Contacts, Childsmile Dental Practice Contacts, and Time Consented to Supervised Toothbrushing).

FVA – Fluoride Varnish Applications

SIMD – Scottish Index of Multiple Deprivation
